# Supplementary material for: A Rare Case of Duodenal Metastasis from Lobular Breast Cancer: From Diagnosis to Surgery
Source: PubMed Central journal article supplement — Case Rep Oncol. 2023 May 31;16(1):406–11. doi: 10.1159/000530603 (PMC10294125; doi:10.1159/000530603), 2023-05-31
Supplement: Supplementary_material-Suppl.1-s1.pdf [file Supplementary_material-Suppl.1-s1.pdf]

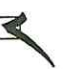

**CARE Checklist of information to include when writing a case report**

| Topic                                    | Item | Checklist item description                                                                                   | Reported on Line                                                    |
|------------------------------------------|------|--------------------------------------------------------------------------------------------------------------|---------------------------------------------------------------------|
| Key Words<br>Abstract<br>(no references) | 1    | The diagnosis or intervention of primary focus followed by the words "case report" .....                     | 1                                                                   |
|                                          | 2    | 2 to 5 key words that identify diagnoses or interventions in this case report, including "case report" ..... | 26                                                                  |
|                                          | 3a   | Introduction: What is unique about this case and what does it add to the scientific literature? .....        | 29                                                                  |
|                                          | 3b   | Main symptoms and/or important clinical findings .....                                                       | 33, 34                                                              |
|                                          | 3c   | The main diagnoses, therapeutic interventions, and outcomes .....                                            | 35, 39, 43, 44                                                      |
| Introduction                             | 3d   | Conclusion—What is the main "take-away" lesson(s) from this case? .....                                      | 45, 46                                                              |
|                                          | 4    | One or two paragraphs summarizing why this case is unique ( <b>may include references</b> ) .....            | 48-58                                                               |
|                                          | 5a   | De-identified patient specific information .....                                                             | 61                                                                  |
| Patient Information                      | 5b   | Primary concerns and symptoms of the patient .....                                                           | 62                                                                  |
|                                          | 5c   | Medical, family, and psycho-social history including relevant genetic information .....                      | 63-72                                                               |
|                                          | 5d   | Relevant past interventions with outcomes .....                                                              | 73-75                                                               |
| Clinical Findings                        | 6    | Describe significant physical examination (PE) and important clinical findings .....                         | 75-85                                                               |
|                                          | 7    | Historical and current information from this episode of care organized as a timeline .....                   | 89-92                                                               |
| Diagnostic Assessment                    | 8a   | Diagnostic testing (such as PE, laboratory testing, imaging, surveys) .....                                  | 94                                                                  |
|                                          | 8b   | Diagnostic challenges (such as access to testing, financial, or cultural) .....                              | 94-101                                                              |
|                                          | 8c   | Diagnosis (including other diagnoses considered) .....                                                       | 94                                                                  |
|                                          | 8d   | Prognosis (such as staging in oncology) where applicable .....                                               | 94-101                                                              |
| Therapeutic Intervention                 | 9a   | Types of therapeutic intervention (such as pharmacologic, surgical, preventive, self-care) .....             | 94-101                                                              |
|                                          | 9b   | Administration of therapeutic intervention (such as dosage, strength, duration) .....                        | 94-101                                                              |
|                                          | 9c   | Changes in therapeutic intervention (with rationale) .....                                                   | 94-101                                                              |
| Follow-up and Outcomes                   | 10a  | Clinician and patient-assessed outcomes (if available) .....                                                 | 101-102                                                             |
|                                          | 10b  | Important follow-up diagnostic and other test results .....                                                  | 101-102                                                             |
|                                          | 10c  | Intervention adherence and tolerability (How was this assessed?) .....                                       | 101-102                                                             |
|                                          | 10d  | Adverse and unanticipated events .....                                                                       | 105-107                                                             |
| Discussion                               | 11a  | A scientific discussion of the strengths AND limitations associated with this case report .....              | 105-116                                                             |
|                                          | 11b  | Discussion of the relevant medical literature <b>with references</b> .....                                   | 116-121                                                             |
|                                          | 11c  | The scientific rationale for any conclusions (including assessment of possible causes) .....                 | 124-128                                                             |
|                                          | 11d  | The primary "take-away" lessons of this case report (without references) in a one paragraph conclusion ..... | 11                                                                  |
| Patient Perspective                      | 12   | The patient should share their perspective in one to two paragraphs on the treatment(s) they received .....  | 11                                                                  |
|                                          | 13   | Did the patient give informed consent? Please provide if requested .....                                     | Yes <input checked="" type="checkbox"/> No <input type="checkbox"/> |
